# Supplementary material for: QTL Mapping of Soybean (Glycine max) Vine Growth Habit Trait
Source: MDPI journal article supplement (doi:10.3390/ijms241914770), 2023-09-30
Supplement: s1 [file s1]

Stable1 The QTLs for VGH in 3 environments and BULP by ICIM mapping

| TraitID | Chromosome | Position | LeftMarker | RightMarker | LOD   | PVE(%) | Add   | LeftCI(Mb) | RightCI(Mb) |
|---------|------------|----------|------------|-------------|-------|--------|-------|------------|-------------|
| 19JZ    | 2          | 445.5    | bin840     | bin841      | 4.29  | 3.23   | -0.15 | 44.5       | 44.7        |
| 19JZ    | 9          | 28.5     | bin3416    | bin3417     | 3.61  | 2.71   | 0.15  | 2.8        | 3.0         |
| 19JZ    | 10         | 74.5     | bin3912    | bin3913     | 3.46  | 2.59   | 0.14  | 7.4        | 7.5         |
| 19JZ    | 11         | 108.5    | bin4367    | bin4368     | 2.79  | 2.08   | 0.13  | 10.8       | 10.9        |
| 19JZ    | 13         | 394      | bin5320    | bin5321     | 4.90  | 4.09   | -0.17 | 39.3       | 39.5        |
| 19JZ    | 18         | 78.5     | bin6892    | bin6893     | 4.48  | 3.38   | -0.16 | 7.8        | 7.9         |
| 19JZ    | 19         | 456.5    | bin7777    | bin7778     | 17.66 | 14.51  | -0.32 | 45.6       | 45.7        |
| 19SY    | 2          | 445.5    | bin840     | bin841      | 7.16  | 6.11   | -0.20 | 44.5       | 44.6        |
| 19SY    | 6          | 77.5     | bin2160    | bin2161     | 4.82  | 4.04   | 0.17  | 7.6        | 7.8         |
| 19SY    | 7          | 82.5     | bin2633    | bin2634     | 2.97  | 2.47   | -0.13 | 8.2        | 8.3         |
| 19SY    | 8          | 458.5    | bin3374    | bin3375     | 5.00  | 4.20   | 0.17  | 45.7       | 45.9        |
| 19SY    | 10         | 87.5     | bin3921    | bin3922     | 6.53  | 5.58   | 0.20  | 8.3        | 9.2         |
| 19SY    | 17         | 118.5    | bin6569    | bin6570     | 4.26  | 3.57   | 0.16  | 11.8       | 11.9        |
| 19SY    | 19         | 454.5    | bin7775    | bin7776     | 10.15 | 8.83   | -0.25 | 45.4       | 45.5        |
| 19SY    | 19         | 464.5    | bin7785    | bin7786     | 6.13  | 5.20   | -0.19 | 46.4       | 46.6        |
| 20JZ    | 2          | 489.5    | bin884     | bin885      | 3.57  | 3.29   | -0.14 | 48.9       | 49.0        |
| 20JZ    | 3          | 372.5    | bin1231    | bin1232     | 4.94  | 4.59   | -0.17 | 37.2       | 37.3        |
| 20JZ    | 7          | 64.5     | bin2615    | bin2616     | 3.99  | 3.69   | -0.15 | 6.4        | 6.5         |
| 20JZ    | 10         | 74.5     | bin3912    | bin3913     | 4.21  | 3.90   | 0.16  | 7.4        | 7.5         |
| 20JZ    | 10         | 456.5    | bin4200    | bin4201     | 8.77  | 8.36   | -0.23 | 45.6       | 45.7        |
| 20JZ    | 11         | 152.5    | bin4396    | bin4397     | 2.80  | 2.48   | -0.12 | 15.2       | 15.3        |
| 20JZ    | 13         | 378      | bin5304    | bin5305     | 4.92  | 4.95   | -0.17 | 37.7       | 37.9        |
| 20JZ    | 17         | 404.5    | bin6801    | bin6802     | 3.26  | 3.00   | 0.14  | 40.4       | 40.6        |
| 20JZ    | 19         | 454.5    | bin7775    | bin7776     | 5.73  | 5.36   | -0.18 | 45.4       | 45.6        |
| 20JZ    | 19         | 464.5    | bin7785    | bin7786     | 6.42  | 6.03   | -0.20 | 46.4       | 46.5        |
| BLUP    | 2          | 445.5    | bin840     | bin841      | 5.94  | 2.74   | -0.11 | 44.5       | 44.6        |
| BLUP    | 2          | 481.5    | bin876     | bin877      | 3.28  | 1.48   | -0.08 | 48.1       | 48.3        |
| BLUP    | 7          | 106.5    | bin2657    | bin2658     | 5.96  | 2.75   | -0.11 | 10.6       | 10.8        |
| BLUP    | 10         | 87.5     | bin3921    | bin3922     | 7.19  | 3.36   | 0.12  | 8.7        | 9.3         |
| BLUP    | 10         | 453.5    | bin4197    | bin4198     | 7.31  | 3.31   | -0.12 | 45.3       | 45.4        |
| BLUP    | 10         | 466.5    | bin4210    | bin4211     | 14.61 | 7.12   | -0.17 | 46.6       | 46.7        |
| BLUP    | 10         | 470.5    | bin4214    | bin4215     | 14.01 | 6.80   | 0.17  | 47.0       | 47.2        |
| BLUP    | 13         | 394      | bin5320    | bin5321     | 8.86  | 4.84   | -0.14 | 39.3       | 39.5        |
| BLUP    | 18         | 78.5     | bin6892    | bin6893     | 17.50 | 8.69   | -0.19 | 7.8        | 7.9         |
| BLUP    | 18         | 96.5     | bin6908    | bin6909     | 10.04 | 4.75   | 0.15  | 9.6        | 9.8         |
| BLUP    | 19         | 454.5    | bin7775    | bin7776     | 18.06 | 9.01   | -0.20 | 45.4       | 45.5        |
| BLUP    | 19         | 464.5    | bin7785    | bin7786     | 9.73  | 4.59   | -0.14 | 46.4       | 46.5        |

Stable 2 The CDS Fst>0.6 genes in major QTL

| Chr | Position | Fst      | type             | color | gene              | geneType |
|-----|----------|----------|------------------|-------|-------------------|----------|
| 6   | 11443806 | 0.845325 | Improved vs Wild | green | Glyma.06G140300.1 | CDS      |
| 6   | 11442295 | 0.802646 | Improved vs Wild | green | Glyma.06G140300.1 | CDS      |
| 6   | 11474797 | 0.604828 | Improved vs Wild | green | Glyma.06G140600.1 | CDS      |
| 6   | 11470251 | 0.872857 | Improved vs Wild | green | Glyma.06G140700.1 | CDS      |
| 6   | 11470251 | 0.587585 | Landrace vs Wild | red   | Glyma.06G140700.1 | CDS      |
| 6   | 11481219 | 0.640317 | Improved vs Wild | green | Glyma.06G140800.1 | CDS      |
| 6   | 11496362 | 0.805488 | Improved vs Wild | green | Glyma.06G141100.1 | CDS      |
| 6   | 11496607 | 0.705407 | Improved vs Wild | green | Glyma.06G141100.1 | CDS      |
| 6   | 11497236 | 0.678474 | Improved vs Wild | green | Glyma.06G141100.1 | CDS      |
| 6   | 11496362 | 0.607148 | Landrace vs Wild | red   | Glyma.06G141100.1 | CDS      |
| 6   | 11522083 | 0.843958 | Improved vs Wild | green | Glyma.06G141300.1 | CDS      |
| 6   | 11522684 | 0.834541 | Improved vs Wild | green | Glyma.06G141300.1 | CDS      |
| 6   | 11522083 | 0.713255 | Landrace vs Wild | red   | Glyma.06G141300.1 | CDS      |
| 6   | 11522690 | 0.70231  | Improved vs Wild | green | Glyma.06G141300.1 | CDS      |
| 6   | 11522684 | 0.699612 | Landrace vs Wild | red   | Glyma.06G141300.1 | CDS      |
| 13  | 39977464 | 0.680176 | Improved vs Wild | green | Glyma.13G302800.1 | CDS      |
| 13  | 39977932 | 0.679271 | Improved vs Wild | green | Glyma.13G302800.1 | CDS      |
| 13  | 39977678 | 0.675691 | Improved vs Wild | green | Glyma.13G302800.1 | CDS      |
| 13  | 39977928 | 0.672709 | Improved vs Wild | green | Glyma.13G302800.1 | CDS      |
| 13  | 40113409 | 0.604441 | Improved vs Wild | green | Glyma.13G304000.1 | CDS      |
| 13  | 40142515 | 0.81075  | Improved vs Wild | green | Glyma.13G304500.1 | CDS      |
| 13  | 40141801 | 0.789565 | Improved vs Wild | green | Glyma.13G304500.1 | CDS      |
| 13  | 40161491 | 0.672788 | Improved vs Wild | green | Glyma.13G304700.1 | CDS      |
| 13  | 40162007 | 0.66588  | Improved vs Wild | green | Glyma.13G304800.1 | CDS      |
| 13  | 40161837 | 0.65291  | Improved vs Wild | green | Glyma.13G304800.1 | CDS      |
| 13  | 40161898 | 0.643951 | Improved vs Wild | green | Glyma.13G304800.1 | CDS      |
| 13  | 40161868 | 0.634435 | Improved vs Wild | green | Glyma.13G304800.1 | CDS      |
| 13  | 40161862 | 0.630431 | Improved vs Wild | green | Glyma.13G304800.1 | CDS      |
| 13  | 40166783 | 0.759249 | Improved vs Wild | green | Glyma.13G304900.1 | CDS      |
| 13  | 40187515 | 0.782835 | Improved vs Wild | green | Glyma.13G305000.1 | CDS      |
| 13  | 40181569 | 0.776905 | Improved vs Wild | green | Glyma.13G305000.1 | CDS      |
| 13  | 40180821 | 0.772042 | Improved vs Wild | green | Glyma.13G305000.1 | CDS      |
| 13  | 40183385 | 0.770271 | Improved vs Wild | green | Glyma.13G305000.1 | CDS      |
| 13  | 40176835 | 0.761564 | Improved vs Wild | green | Glyma.13G305000.1 | CDS      |
| 13  | 40178572 | 0.758122 | Improved vs Wild | green | Glyma.13G305000.1 | CDS      |
| 13  | 40177383 | 0.750156 | Improved vs Wild | green | Glyma.13G305000.1 | CDS      |
| 13  | 40177585 | 0.747363 | Improved vs Wild | green | Glyma.13G305000.1 | CDS      |
| 19  | 45077823 | 0.640885 | Landrace vs Wild | red   | Glyma.19G192900.1 | CDS      |
| 19  | 45115082 | 0.697218 | Landrace vs Wild | red   | Glyma.19G193400.1 | CDS      |
| 19  | 45115082 | 0.637407 | Improved vs Wild | green | Glyma.19G193400.1 | CDS      |
| 19  | 45208914 | 0.680157 | Landrace vs Wild | red   | Glyma.19G194600.1 | CDS      |
| 19  | 45208914 | 0.64908  | Improved vs Wild | green | Glyma.19G194600.1 | CDS      |
| 19  | 45923578 | 0.877593 | Improved vs Wild | green | Glyma.19G202300.1 | CDS      |

|    |          |          |                  |       |                   |     |
|----|----------|----------|------------------|-------|-------------------|-----|
| 19 | 45923578 | 0.869822 | Landrace vs Wild | red   | Glyma.19G202300.1 | CDS |
| 19 | 45951928 | 0.73231  | Landrace vs Wild | red   | Glyma.19G202800.1 | CDS |
| 19 | 45951928 | 0.710076 | Improved vs Wild | green | Glyma.19G202800.1 | CDS |
| 19 | 46011961 | 0.65206  | Landrace vs Wild | red   | Glyma.19G203700.1 | CDS |
| 19 | 46011961 | 0.64313  | Improved vs Wild | green | Glyma.19G203700.1 | CDS |
| 19 | 46015763 | 0.715995 | Landrace vs Wild | red   | Glyma.19G203800.1 | CDS |
| 19 | 46015763 | 0.697255 | Improved vs Wild | green | Glyma.19G203800.1 | CDS |
| 19 | 46039187 | 0.764734 | Improved vs Wild | green | Glyma.19G204200.1 | CDS |
| 19 | 46046257 | 0.763284 | Landrace vs Wild | red   | Glyma.19G204200.1 | CDS |
| 19 | 46048348 | 0.756091 | Landrace vs Wild | red   | Glyma.19G204200.1 | CDS |
| 19 | 46039187 | 0.754924 | Landrace vs Wild | red   | Glyma.19G204200.1 | CDS |
| 19 | 46046257 | 0.729741 | Improved vs Wild | green | Glyma.19G204200.1 | CDS |
| 19 | 46048348 | 0.729603 | Improved vs Wild | green | Glyma.19G204200.1 | CDS |
| 19 | 46086492 | 0.772242 | Landrace vs Wild | red   | Glyma.19G204700.1 | CDS |
| 19 | 46086492 | 0.743622 | Improved vs Wild | green | Glyma.19G204700.1 | CDS |
| 19 | 46124056 | 0.637976 | Landrace vs Wild | red   | Glyma.19G205200.1 | CDS |
| 19 | 46124056 | 0.610482 | Improved vs Wild | green | Glyma.19G205200.1 | CDS |
| 19 | 46124083 | 0.610326 | Landrace vs Wild | red   | Glyma.19G205200.1 | CDS |

Stable 3. SNPs and small InDels in the major QTL region

| Chr   | Position | Ref     | Alt                   | Effect type        | Gene name       | Type  | QTL            |
|-------|----------|---------|-----------------------|--------------------|-----------------|-------|----------------|
| Chr06 | 11470193 | T       | TAATTCTG<br>AAAACCTGA | stop_gained        | Glyma.06G140700 | InDel | <i>qVGH6-1</i> |
| Chr06 | 11475127 | ACC     | A                     | frame_shief        | Glyma.06G140600 | InDel | <i>qVGH6-1</i> |
| Chr06 | 11475159 | ACGACAT | A                     | codon_deletion     | Glyma.06G140600 | InDel | <i>qVGH6-1</i> |
| Chr06 | 11494867 | T       | TA                    | splice_site_region | Glyma.06G141100 | InDel | <i>qVGH6-1</i> |
| Chr06 | 11435928 | G       | T                     | start_gained       | Glyma.06G140100 | SNP   | <i>qVGH6-1</i> |
| Chr06 | 11437214 | G       | A                     | non_synonymous     | Glyma.06G140100 | SNP   | <i>qVGH6-1</i> |
| Chr06 | 11439628 | T       | A                     | non_synonymous     | Glyma.06G140200 | SNP   | <i>qVGH6-1</i> |
| Chr06 | 11441256 | A       | C                     | non_synonymous     | Glyma.06G140200 | SNP   | <i>qVGH6-1</i> |
| Chr06 | 11441469 | T       | A                     | start_gained       | Glyma.06G140200 | SNP   | <i>qVGH6-1</i> |
| Chr06 | 11443459 | G       | A                     | splice_site_region | Glyma.06G140300 | SNP   | <i>qVGH6-1</i> |
| Chr06 | 11444065 | A       | C                     | splice_site_region | Glyma.06G140300 | SNP   | <i>qVGH6-1</i> |
| Chr06 | 11449817 | T       | C                     | non_synonymous     | Glyma.06G140400 | SNP   | <i>qVGH6-1</i> |
| Chr06 | 11470251 | A       | G                     | non_synonymous     | Glyma.06G140700 | SNP   | <i>qVGH6-1</i> |
| Chr06 | 11474894 | C       | G                     | non_synonymous     | Glyma.06G140600 | SNP   | <i>qVGH6-1</i> |
| Chr06 | 11475217 | A       | G                     | start_gained       | Glyma.06G140600 | SNP   | <i>qVGH6-1</i> |
| Chr06 | 11496362 | G       | T                     | non_synonymous     | Glyma.06G141100 | SNP   | <i>qVGH6-1</i> |
| Chr06 | 11497220 | T       | G                     | non_synonymous     | Glyma.06G141100 | SNP   | <i>qVGH6-1</i> |
| Chr06 | 11497236 | A       | G                     | non_synonymous     | Glyma.06G141100 | SNP   | <i>qVGH6-1</i> |
| Chr06 | 11503372 | C       | T                     | non_synonymous     | Glyma.06G141200 | SNP   | <i>qVGH6-1</i> |
| Chr06 | 11503396 | C       | A                     | non_synonymous     | Glyma.06G141200 | SNP   | <i>qVGH6-1</i> |
| Chr06 | 11522083 | G       | C                     | non_synonymous     | Glyma.06G141300 | SNP   | <i>qVGH6-1</i> |

|       |          |      |      |                    |                 |       |                 |
|-------|----------|------|------|--------------------|-----------------|-------|-----------------|
| Chr06 | 11522684 | A    | T    | non_synonymous     | Glyma.06G141300 | SNP   | <i>qVGH6-1</i>  |
| Chr06 | 11522690 | A    | T    | non_synonymous     | Glyma.06G141300 | SNP   | <i>qVGH6-1</i>  |
| Chr13 | 1706509  | G    | GTTC | codon_insertion    | Glyma.13G005800 | InDel | <i>qVGH6-1</i>  |
| Chr13 | 1806789  | G    | GT   | frame_shief        | Glyma.13G006000 | InDel | <i>qVGH13-1</i> |
| Chr13 | 1848057  | AATG | A    | codon_deletion     | Glyma.13G006200 | InDel | <i>qVGH13-1</i> |
| Chr13 | 1853678  | G    | GA   | frame_shief        | Glyma.13G006300 | InDel | <i>qVGH13-1</i> |
| Chr13 | 1949294  | T    | TA   | frame_shief        | Glyma.13G006800 | InDel | <i>qVGH13-1</i> |
| Chr13 | 1962693  | TC   | T    | frame_shief        | Glyma.13G007100 | InDel | <i>qVGH13-1</i> |
| Chr13 | 2095329  | CA   | C    | frame_shief        | Glyma.13G007700 | InDel | <i>qVGH13-1</i> |
| Chr13 | 2476569  | GTA  | G    | frame_shief        | Glyma.13G008700 | InDel | <i>qVGH13-1</i> |
| Chr13 | 2655987  | G    | GT   | splice_site_region | Glyma.13G009800 | InDel | <i>qVGH13-1</i> |
| Chr13 | 2833169  | T    | TTA  | frame_shief        | Glyma.13G010300 | InDel | <i>qVGH13-1</i> |
| Chr13 | 2839809  | GC   | G    | frame_shief        | Glyma.13G010400 | InDel | <i>qVGH13-1</i> |
| Chr13 | 1640028  | C    | T    | non_synonymous     | Glyma.13G005700 | SNP   | <i>qVGH13-1</i> |
| Chr13 | 1640830  | C    | T    | non_synonymous     | Glyma.13G005700 | SNP   | <i>qVGH13-1</i> |
| Chr13 | 1844334  | T    | C    | start_gained       | Glyma.13G006200 | SNP   | <i>qVGH13-1</i> |
| Chr13 | 1844449  | A    | G    | non_synonymous     | Glyma.13G006200 | SNP   | <i>qVGH13-1</i> |
| Chr13 | 1852696  | T    | C    | non_synonymous     | Glyma.13G006300 | SNP   | <i>qVGH13-1</i> |
| Chr13 | 1852900  | C    | T    | non_synonymous     | Glyma.13G006300 | SNP   | <i>qVGH13-1</i> |
| Chr13 | 1859005  | G    | A    | non_synonymous     | Glyma.13G006200 | SNP   | <i>qVGH13-1</i> |
| Chr13 | 1859929  | T    | G    | non_synonymous     | Glyma.13G006200 | SNP   | <i>qVGH13-1</i> |
| Chr13 | 1859940  | G    | T    | non_synonymous     | Glyma.13G006200 | SNP   | <i>qVGH13-1</i> |
| Chr13 | 1860009  | A    | T    | non_synonymous     | Glyma.13G006200 | SNP   | <i>qVGH13-1</i> |
| Chr13 | 1860021  | C    | A    | non_synonymous     | Glyma.13G006200 | SNP   | <i>qVGH13-1</i> |
| Chr13 | 1860141  | G    | T    | non_synonymous     | Glyma.13G006200 | SNP   | <i>qVGH13-1</i> |
| Chr13 | 1860502  | T    | G    | non_synonymous     | Glyma.13G006200 | SNP   | <i>qVGH13-1</i> |
| Chr13 | 1860514  | A    | T    | non_synonymous     | Glyma.13G006200 | SNP   | <i>qVGH13-1</i> |
| Chr13 | 1864527  | C    | T    | non_synonymous     | Glyma.13G006400 | SNP   | <i>qVGH13-1</i> |
| Chr13 | 1864541  | G    | A    | non_synonymous     | Glyma.13G006400 | SNP   | <i>qVGH13-1</i> |
| Chr13 | 1864800  | C    | A    | non_synonymous     | Glyma.13G006400 | SNP   | <i>qVGH13-1</i> |
| Chr13 | 1864958  | C    | T    | stop_gained        | Glyma.13G006400 | SNP   | <i>qVGH13-1</i> |
| Chr13 | 1865564  | G    | A    | non_synonymous     | Glyma.13G006400 | SNP   | <i>qVGH13-1</i> |
| Chr13 | 1897370  | C    | T    | non_synonymous     | Glyma.13G006600 | SNP   | <i>qVGH13-1</i> |
| Chr13 | 1933143  | C    | T    | non_synonymous     | Glyma.13G006700 | SNP   | <i>qVGH13-1</i> |
| Chr13 | 1949302  | T    | C    | non_synonymous     | Glyma.13G006800 | SNP   | <i>qVGH13-1</i> |
| Chr13 | 1949496  | A    | C    | non_synonymous     | Glyma.13G006800 | SNP   | <i>qVGH13-1</i> |
| Chr13 | 1950648  | C    | T    | non_synonymous     | Glyma.13G006900 | SNP   | <i>qVGH13-1</i> |
| Chr13 | 1962522  | T    | C    | non_synonymous     | Glyma.13G007100 | SNP   | <i>qVGH13-1</i> |
| Chr13 | 1962828  | G    | A    | non_synonymous     | Glyma.13G007100 | SNP   | <i>qVGH13-1</i> |
| Chr13 | 1969875  | T    | G    | splice_site_region | Glyma.13G007200 | SNP   | <i>qVGH13-1</i> |
| Chr13 | 1970035  | C    | T    | splice_site_region | Glyma.13G007200 | SNP   | <i>qVGH13-1</i> |
| Chr13 | 2008921  | G    | A    | non_synonymous     | Glyma.13G007300 | SNP   | <i>qVGH13-1</i> |
| Chr13 | 2009843  | G    | A    | stop_gained        | Glyma.13G007400 | SNP   | <i>qVGH13-1</i> |
| Chr13 | 2012163  | G    | A    | non_synonymous     | Glyma.13G007400 | SNP   | <i>qVGH13-1</i> |

|       |         |   |   |                      |                 |     |                 |
|-------|---------|---|---|----------------------|-----------------|-----|-----------------|
| Chr13 | 2014664 | A | C | non_synonymous       | Glyma.13G007500 | SNP | <i>qVGH13-1</i> |
| Chr13 | 2015111 | A | G | non_synonymous       | Glyma.13G007500 | SNP | <i>qVGH13-1</i> |
| Chr13 | 2029233 | T | A | non_synonymous       | Glyma.13G007400 | SNP | <i>qVGH13-1</i> |
| Chr13 | 2091676 | A | G | splice_site_region   | Glyma.13G007700 | SNP | <i>qVGH13-1</i> |
| Chr13 | 2092170 | T | C | non_synonymous       | Glyma.13G007700 | SNP | <i>qVGH13-1</i> |
| Chr13 | 2092401 | C | G | non_synonymous       | Glyma.13G007700 | SNP | <i>qVGH13-1</i> |
| Chr13 | 2092562 | G | C | non_synonymous       | Glyma.13G007700 | SNP | <i>qVGH13-1</i> |
| Chr13 | 2092812 | A | C | non_synonymous       | Glyma.13G007700 | SNP | <i>qVGH13-1</i> |
| Chr13 | 2093253 | A | C | non_synonymous       | Glyma.13G007700 | SNP | <i>qVGH13-1</i> |
| Chr13 | 2093823 | A | G | non_synonymous       | Glyma.13G007700 | SNP | <i>qVGH13-1</i> |
| Chr13 | 2093870 | C | T | stop_gained          | Glyma.13G007700 | SNP | <i>qVGH13-1</i> |
| Chr13 | 2093985 | G | A | non_synonymous       | Glyma.13G007700 | SNP | <i>qVGH13-1</i> |
| Chr13 | 2094008 | G | A | non_synonymous       | Glyma.13G007700 | SNP | <i>qVGH13-1</i> |
| Chr13 | 2094496 | C | T | non_synonymous       | Glyma.13G007700 | SNP | <i>qVGH13-1</i> |
| Chr13 | 2094515 | T | A | non_synonymous       | Glyma.13G007700 | SNP | <i>qVGH13-1</i> |
| Chr13 | 2095020 | C | T | non_synonymous       | Glyma.13G007700 | SNP | <i>qVGH13-1</i> |
| Chr13 | 2095265 | A | G | non_synonymous       | Glyma.13G007700 | SNP | <i>qVGH13-1</i> |
| Chr13 | 2095313 | C | T | stop_gained          | Glyma.13G007700 | SNP | <i>qVGH13-1</i> |
| Chr13 | 2095403 | G | A | stop_gained          | Glyma.13G007700 | SNP | <i>qVGH13-1</i> |
| Chr13 | 2095495 | T | C | non_synonymous       | Glyma.13G007700 | SNP | <i>qVGH13-1</i> |
| Chr13 | 2095779 | C | A | non_synonymous       | Glyma.13G007700 | SNP | <i>qVGH13-1</i> |
| Chr13 | 2095810 | A | G | non_synonymous       | Glyma.13G007700 | SNP | <i>qVGH13-1</i> |
| Chr13 | 2096148 | A | T | non_synonymous       | Glyma.13G007700 | SNP | <i>qVGH13-1</i> |
| Chr13 | 2118853 | G | A | non_synonymous       | Glyma.13G007800 | SNP | <i>qVGH13-1</i> |
| Chr13 | 2120526 | A | T | non_synonymous       | Glyma.13G007800 | SNP | <i>qVGH13-1</i> |
| Chr13 | 2121368 | G | A | non_synonymous       | Glyma.13G007800 | SNP | <i>qVGH13-1</i> |
| Chr13 | 2121376 | T | A | non_synonymous       | Glyma.13G007800 | SNP | <i>qVGH13-1</i> |
| Chr13 | 2122454 | T | A | non_synonymous       | Glyma.13G007800 | SNP | <i>qVGH13-1</i> |
| Chr13 | 2127998 | G | A | non_synonymous       | Glyma.13G007900 | SNP | <i>qVGH13-1</i> |
| Chr13 | 2128700 | A | T | non_synonymous       | Glyma.13G007900 | SNP | <i>qVGH13-1</i> |
| Chr13 | 2129983 | T | G | non_synonymous       | Glyma.13G007900 | SNP | <i>qVGH13-1</i> |
| Chr13 | 2233279 | C | T | non_synonymous       | Glyma.13G008000 | SNP | <i>qVGH13-1</i> |
| Chr13 | 2250427 | G | A | non_synonymous       | Glyma.13G008100 | SNP | <i>qVGH13-1</i> |
| Chr13 | 2250550 | C | T | splice_site_acceptor | Glyma.13G008100 | SNP | <i>qVGH13-1</i> |
| Chr13 | 2250939 | C | T | non_synonymous       | Glyma.13G008100 | SNP | <i>qVGH13-1</i> |
| Chr13 | 2346958 | G | A | non_synonymous       | Glyma.13G008200 | SNP | <i>qVGH13-1</i> |
| Chr13 | 2399207 | T | G | non_synonymous       | Glyma.13G008300 | SNP | <i>qVGH13-1</i> |
| Chr13 | 2412668 | T | C | non_synonymous       | Glyma.13G008400 | SNP | <i>qVGH13-1</i> |
| Chr13 | 2412705 | C | A | non_synonymous       | Glyma.13G008400 | SNP | <i>qVGH13-1</i> |
| Chr13 | 2412752 | C | T | non_synonymous       | Glyma.13G008400 | SNP | <i>qVGH13-1</i> |
| Chr13 | 2413040 | C | T | non_synonymous       | Glyma.13G008400 | SNP | <i>qVGH13-1</i> |
| Chr13 | 2413211 | T | C | non_synonymous       | Glyma.13G008400 | SNP | <i>qVGH13-1</i> |
| Chr13 | 2413406 | A | G | non_synonymous       | Glyma.13G008400 | SNP | <i>qVGH13-1</i> |
| Chr13 | 2413473 | T | C | non_synonymous       | Glyma.13G008400 | SNP | <i>qVGH13-1</i> |

|       |          |            |       |                      |                 |       |                 |
|-------|----------|------------|-------|----------------------|-----------------|-------|-----------------|
| Chr13 | 2438737  | A          | T     | non_synonymous       | Glyma.13G008500 | SNP   | <i>qVGH13-1</i> |
| Chr13 | 2471142  | T          | A     | stop_gained          | Glyma.13G008600 | SNP   | <i>qVGH13-1</i> |
| Chr13 | 2476472  | T          | G     | non_synonymous       | Glyma.13G008700 | SNP   | <i>qVGH13-1</i> |
| Chr13 | 2512032  | C          | T     | non_synonymous       | Glyma.13G008800 | SNP   | <i>qVGH13-1</i> |
| Chr13 | 2512173  | C          | T     | non_synonymous       | Glyma.13G008800 | SNP   | <i>qVGH13-1</i> |
| Chr13 | 2535289  | G          | T     | non_synonymous       | Glyma.13G009000 | SNP   | <i>qVGH13-1</i> |
| Chr13 | 2566263  | C          | T     | non_synonymous       | Glyma.13G009200 | SNP   | <i>qVGH13-1</i> |
| Chr13 | 2566651  | C          | T     | non_synonymous       | Glyma.13G009200 | SNP   | <i>qVGH13-1</i> |
| Chr13 | 2566693  | C          | A     | non_synonymous       | Glyma.13G009200 | SNP   | <i>qVGH13-1</i> |
| Chr13 | 2566704  | A          | T     | non_synonymous       | Glyma.13G009200 | SNP   | <i>qVGH13-1</i> |
| Chr13 | 2566914  | C          | A     | splice_site_region   | Glyma.13G009200 | SNP   | <i>qVGH13-1</i> |
| Chr13 | 2568003  | C          | T     | stop_gained          | Glyma.13G009200 | SNP   | <i>qVGH13-1</i> |
| Chr13 | 2568012  | G          | T     | non_synonymous       | Glyma.13G009200 | SNP   | <i>qVGH13-1</i> |
| Chr13 | 2618209  | T          | C     | non_synonymous       | Glyma.13G009400 | SNP   | <i>qVGH13-1</i> |
| Chr13 | 2618405  | A          | G     | non_synonymous       | Glyma.13G009400 | SNP   | <i>qVGH13-1</i> |
| Chr13 | 2618413  | A          | T     | non_synonymous       | Glyma.13G009400 | SNP   | <i>qVGH13-1</i> |
| Chr13 | 2625854  | T          | C     | non_synonymous       | Glyma.13G009500 | SNP   | <i>qVGH13-1</i> |
| Chr13 | 2626915  | T          | A     | non_synonymous       | Glyma.13G009500 | SNP   | <i>qVGH13-1</i> |
| Chr13 | 2627146  | T          | G     | non_synonymous       | Glyma.13G009500 | SNP   | <i>qVGH13-1</i> |
| Chr13 | 2628187  | T          | A     | non_synonymous       | Glyma.13G009500 | SNP   | <i>qVGH13-1</i> |
| Chr13 | 2628628  | A          | G     | non_synonymous       | Glyma.13G009500 | SNP   | <i>qVGH13-1</i> |
| Chr13 | 2628704  | C          | T     | non_synonymous       | Glyma.13G009500 | SNP   | <i>qVGH13-1</i> |
| Chr13 | 2628953  | G          | C     | non_synonymous       | Glyma.13G009500 | SNP   | <i>qVGH13-1</i> |
| Chr13 | 2629117  | C          | A     | non_synonymous       | Glyma.13G009500 | SNP   | <i>qVGH13-1</i> |
| Chr13 | 2641650  | G          | A     | non_synonymous       | Glyma.13G009700 | SNP   | <i>qVGH13-1</i> |
| Chr13 | 2656160  | C          | A     | non_synonymous       | Glyma.13G009800 | SNP   | <i>qVGH13-1</i> |
| Chr13 | 2833684  | G          | A     | non_synonymous       | Glyma.13G010300 | SNP   | <i>qVGH13-1</i> |
| Chr13 | 8436671  | A          | ATTCT | frame_shief          | Glyma.13G029100 | InDel | <i>qVGH13-2</i> |
| Chr13 | 9112675  | CTTCT      | C     | frame_shief          | Glyma.13G029800 | InDel | <i>qVGH13-2</i> |
| Chr13 | 8626619  | A          | T     | non_synonymous       | Glyma.13G029400 | SNP   | <i>qVGH13-2</i> |
| Chr13 | 8627266  | G          | A     | non_synonymous       | Glyma.13G029400 | SNP   | <i>qVGH13-2</i> |
| Chr13 | 8627509  | G          | A     | non_synonymous       | Glyma.13G029400 | SNP   | <i>qVGH13-2</i> |
| Chr13 | 8628210  | G          | A     | non_synonymous       | Glyma.13G029400 | SNP   | <i>qVGH13-2</i> |
| Chr13 | 9036028  | A          | T     | non_synonymous       | Glyma.13G029700 | SNP   | <i>qVGH13-2</i> |
| Chr13 | 9111159  | G          | A     | non_synonymous       | Glyma.13G029800 | SNP   | <i>qVGH13-2</i> |
| Chr13 | 39979426 | CTA        | C     | splice_site_region   | Glyma.13G302800 | InDel | <i>qVGH13-3</i> |
| Chr13 | 40007092 | GTACATGGA  | G     | frame_shief          | Glyma.13G303100 | InDel | <i>qVGH13-3</i> |
| Chr13 | 40008552 | ACAAGTATAT | A     | splice_site_donor    | Glyma.13G303100 | InDel | <i>qVGH13-3</i> |
|       |          | ATAGGATATG |       |                      |                 |       |                 |
|       |          | TTGTTTGATT |       |                      |                 |       |                 |
|       |          | ATACCTG    |       |                      |                 |       |                 |
| Chr13 | 40155077 | T          | TGTG  | codon_insertion      | Glyma.13G304600 | InDel | <i>qVGH13-3</i> |
| Chr13 | 39977464 | A          | G     | non_synonymous       | Glyma.13G302800 | SNP   | <i>qVGH13-3</i> |
| Chr13 | 39978523 | C          | A     | splice_site_acceptor | Glyma.13G302800 | SNP   | <i>qVGH13-3</i> |

|       |          |     |     |                    |                 |       |                   |
|-------|----------|-----|-----|--------------------|-----------------|-------|-------------------|
| Chr13 | 39979827 | C   | A   | start_gained       | Glyma.13G302800 | SNP   | <i>qVGH13-3</i>   |
| Chr13 | 40007179 | A   | C   | non_synonymous     | Glyma.13G303100 | SNP   | <i>qVGH13-3</i>   |
| Chr13 | 40007455 | C   | A   | non_synonymous     | Glyma.13G303100 | SNP   | <i>qVGH13-3</i>   |
| Chr13 | 40008634 | G   | A   | non_synonymous     | Glyma.13G303100 | SNP   | <i>qVGH13-3</i>   |
| Chr13 | 40008648 | C   | G   | non_synonymous     | Glyma.13G303100 | SNP   | <i>qVGH13-3</i>   |
| Chr13 | 40048948 | A   | T   | non_synonymous     | Glyma.13G303400 | SNP   | <i>qVGH13-3</i>   |
| Chr13 | 40053423 | A   | C   | non_synonymous     | Glyma.13G303500 | SNP   | <i>qVGH13-3</i>   |
| Chr13 | 40091120 | A   | G   | non_synonymous     | Glyma.13G303800 | SNP   | <i>qVGH13-3</i>   |
| Chr13 | 40091547 | G   | A   | non_synonymous     | Glyma.13G303800 | SNP   | <i>qVGH13-3</i>   |
| Chr13 | 40091637 | T   | A   | non_synonymous     | Glyma.13G303800 | SNP   | <i>qVGH13-3</i>   |
| Chr13 | 40091969 | C   | G   | non_synonymous     | Glyma.13G303800 | SNP   | <i>qVGH13-3</i>   |
| Chr13 | 40091975 | G   | T   | non_synonymous     | Glyma.13G303800 | SNP   | <i>qVGH13-3</i>   |
| Chr13 | 40092128 | T   | A   | non_synonymous     | Glyma.13G303800 | SNP   | <i>qVGH13-3</i>   |
| Chr13 | 40092373 | G   | C   | start_gained       | Glyma.13G303800 | SNP   | <i>qVGH13-3</i>   |
| Chr13 | 40099952 | A   | C   | non_synonymous     | Glyma.13G303900 | SNP   | <i>qVGH13-3</i>   |
| Chr13 | 40117293 | G   | C   | non_synonymous     | Glyma.13G304000 | SNP   | <i>qVGH13-3</i>   |
| Chr13 | 40119742 | T   | C   | non_synonymous     | Glyma.13G304100 | SNP   | <i>qVGH13-3</i>   |
| Chr13 | 40141801 | C   | T   | non_synonymous     | Glyma.13G304500 | SNP   | <i>qVGH13-3</i>   |
| Chr13 | 40156334 | G   | A   | stop_gained        | Glyma.13G304600 | SNP   | <i>qVGH13-3</i>   |
| Chr13 | 40156795 | C   | T   | non_synonymous     | Glyma.13G304600 | SNP   | <i>qVGH13-3</i>   |
| Chr13 | 40160506 | T   | C   | splice_site_donor  | Glyma.13G304700 | SNP   | <i>qVGH13-3</i>   |
| Chr13 | 40161491 | A   | C   | STOP_LOST          | Glyma.13G304700 | SNP   | <i>qVGH13-3</i>   |
| Chr13 | 40161837 | T   | C   | non_synonymous     | Glyma.13G304800 | SNP   | <i>qVGH13-3</i>   |
| Chr13 | 40161862 | A   | G   | non_synonymous     | Glyma.13G304800 | SNP   | <i>qVGH13-3</i>   |
| Chr13 | 40161898 | G   | C   | non_synonymous     | Glyma.13G304800 | SNP   | <i>qVGH13-3</i>   |
| Chr13 | 40162007 | G   | A   | non_synonymous     | Glyma.13G304800 | SNP   | <i>qVGH13-3</i>   |
| Chr13 | 40176835 | G   | A   | non_synonymous     | Glyma.13G305000 | SNP   | <i>qVGH13-3</i>   |
| Chr13 | 40180722 | G   | A   | non_synonymous     | Glyma.13G305000 | SNP   | <i>qVGH13-3</i>   |
| Chr13 | 40180821 | G   | A   | non_synonymous     | Glyma.13G305000 | SNP   | <i>qVGH13-3</i>   |
| Chr19 | 45043376 | ACT | A   | splice_site_region | Glyma.19G192700 | InDel | <i>qVGH19-1.1</i> |
| Chr19 | 45934239 | T   | TC  | frame_shief        | Glyma.19G202400 | InDel | <i>qVGH19-1.2</i> |
| Chr19 | 45934483 | G   | GTT | splice_site_region | Glyma.19G202400 | InDel | <i>qVGH19-1.2</i> |
| Chr19 | 45934533 | A   | AGT | frame_shief        | Glyma.19G202400 | InDel | <i>qVGH19-1.2</i> |
| Chr19 | 45950057 | TA  | T   | frame_shief        | Glyma.19G202800 | InDel | <i>qVGH19-1.2</i> |
| Chr19 | 45950073 | A   | AT  | frame_shief        | Glyma.19G202800 | InDel | <i>qVGH19-1.2</i> |
| Chr19 | 45071789 | G   | T   | non_synonymous     | Glyma.19G192900 | SNP   | <i>qVGH19-1.1</i> |
| Chr19 | 45075111 | T   | C   | non_synonymous     | Glyma.19G192900 | SNP   | <i>qVGH19-1.1</i> |
| Chr19 | 45077823 | G   | A   | non_synonymous     | Glyma.19G192900 | SNP   | <i>qVGH19-1.1</i> |
| Chr19 | 45077858 | T   | C   | start_gained       | Glyma.19G192900 | SNP   | <i>qVGH19-1.1</i> |
| Chr19 | 45087020 | T   | A   | non_synonymous     | Glyma.19G193100 | SNP   | <i>qVGH19-1.1</i> |
| Chr19 | 45087102 | A   | C   | non_synonymous     | Glyma.19G193100 | SNP   | <i>qVGH19-1.1</i> |
| Chr19 | 45087110 | T   | C   | non_synonymous     | Glyma.19G193100 | SNP   | <i>qVGH19-1.1</i> |
| Chr19 | 45087390 | C   | A   | non_synonymous     | Glyma.19G193100 | SNP   | <i>qVGH19-1.1</i> |
| Chr19 | 45089587 | A   | C   | splice_site_region | Glyma.19G193100 | SNP   | <i>qVGH19-1.1</i> |

|       |          |   |   |                    |                 |     |                   |
|-------|----------|---|---|--------------------|-----------------|-----|-------------------|
| Chr19 | 45114951 | A | G | non_synonymous     | Glyma.19G193400 | SNP | <i>qVGH19-1.1</i> |
| Chr19 | 45164521 | A | T | non_synonymous     | Glyma.19G194100 | SNP | <i>qVGH19-1.1</i> |
| Chr19 | 45184804 | C | A | non_synonymous     | Glyma.19G194300 | SNP | <i>qVGH19-1.1</i> |
| Chr19 | 45200508 | A | T | non_synonymous     | Glyma.19G194400 | SNP | <i>qVGH19-1.1</i> |
| Chr19 | 45203982 | G | A | non_synonymous     | Glyma.19G194500 | SNP | <i>qVGH19-1.1</i> |
| Chr19 | 45204441 | A | C | non_synonymous     | Glyma.19G194500 | SNP | <i>qVGH19-1.1</i> |
| Chr19 | 45208309 | T | A | non_synonymous     | Glyma.19G194600 | SNP | <i>qVGH19-1.1</i> |
| Chr19 | 45209242 | A | G | splice_site_region | Glyma.19G194600 | SNP | <i>qVGH19-1.1</i> |
| Chr19 | 45923578 | T | G | non_synonymous     | Glyma.19G202300 | SNP | <i>qVGH19-1.2</i> |
| Chr19 | 45933900 | C | T | non_synonymous     | Glyma.19G202400 | SNP | <i>qVGH19-1.2</i> |
| Chr19 | 45933957 | A | T | stop_gained        | Glyma.19G202400 | SNP | <i>qVGH19-1.2</i> |
| Chr19 | 45933964 | C | T | non_synonymous     | Glyma.19G202400 | SNP | <i>qVGH19-1.2</i> |
| Chr19 | 45933986 | G | T | non_synonymous     | Glyma.19G202400 | SNP | <i>qVGH19-1.2</i> |
| Chr19 | 45934021 | C | T | non_synonymous     | Glyma.19G202400 | SNP | <i>qVGH19-1.2</i> |
| Chr19 | 45934048 | C | T | non_synonymous     | Glyma.19G202400 | SNP | <i>qVGH19-1.2</i> |
| Chr19 | 45934147 | G | A | splice_site_region | Glyma.19G202400 | SNP | <i>qVGH19-1.2</i> |
| Chr19 | 45934185 | G | A | stop_gained        | Glyma.19G202400 | SNP | <i>qVGH19-1.2</i> |
| Chr19 | 45934509 | G | A | non_synonymous     | Glyma.19G202400 | SNP | <i>qVGH19-1.2</i> |
| Chr19 | 45950170 | G | A | non_synonymous     | Glyma.19G202800 | SNP | <i>qVGH19-1.2</i> |
| Chr19 | 45950265 | C | G | non_synonymous     | Glyma.19G202800 | SNP | <i>qVGH19-1.2</i> |
| Chr19 | 45950401 | A | G | non_synonymous     | Glyma.19G202800 | SNP | <i>qVGH19-1.2</i> |
| Chr19 | 45990686 | C | A | non_synonymous     | Glyma.19G203200 | SNP | <i>qVGH19-1.2</i> |
| Chr19 | 45991024 | A | G | non_synonymous     | Glyma.19G203200 | SNP | <i>qVGH19-1.2</i> |
| Chr19 | 45999678 | C | G | non_synonymous     | Glyma.19G203400 | SNP | <i>qVGH19-1.2</i> |
| Chr19 | 45999764 | A | C | non_synonymous     | Glyma.19G203400 | SNP | <i>qVGH19-1.2</i> |
| Chr19 | 45999775 | T | A | non_synonymous     | Glyma.19G203400 | SNP | <i>qVGH19-1.2</i> |
| Chr19 | 45999915 | G | A | non_synonymous     | Glyma.19G203400 | SNP | <i>qVGH19-1.2</i> |
| Chr19 | 46000120 | T | G | non_synonymous     | Glyma.19G203400 | SNP | <i>qVGH19-1.2</i> |
| Chr19 | 46000435 | T | C | non_synonymous     | Glyma.19G203400 | SNP | <i>qVGH19-1.2</i> |
| Chr19 | 46000505 | G | T | non_synonymous     | Glyma.19G203400 | SNP | <i>qVGH19-1.2</i> |
| Chr19 | 46001553 | A | T | non_synonymous     | Glyma.19G203400 | SNP | <i>qVGH19-1.2</i> |
| Chr19 | 46002449 | G | T | non_synonymous     | Glyma.19G203400 | SNP | <i>qVGH19-1.2</i> |
| Chr19 | 46002989 | A | T | non_synonymous     | Glyma.19G203400 | SNP | <i>qVGH19-1.2</i> |
| Chr19 | 46003236 | C | T | non_synonymous     | Glyma.19G203400 | SNP | <i>qVGH19-1.2</i> |
| Chr19 | 46003251 | C | T | non_synonymous     | Glyma.19G203400 | SNP | <i>qVGH19-1.2</i> |
| Chr19 | 46003289 | G | T | non_synonymous     | Glyma.19G203400 | SNP | <i>qVGH19-1.2</i> |
| Chr19 | 46003999 | T | C | splice_site_region | Glyma.19G203400 | SNP | <i>qVGH19-1.2</i> |
| Chr19 | 46004140 | G | A | non_synonymous     | Glyma.19G203400 | SNP | <i>qVGH19-1.2</i> |
| Chr19 | 46004174 | T | G | non_synonymous     | Glyma.19G203400 | SNP | <i>qVGH19-1.2</i> |
| Chr19 | 46004404 | T | C | non_synonymous     | Glyma.19G203400 | SNP | <i>qVGH19-1.2</i> |
| Chr19 | 46007619 | C | T | non_synonymous     | Glyma.19G203500 | SNP | <i>qVGH19-1.2</i> |
| Chr19 | 46009432 | T | A | non_synonymous     | Glyma.19G203600 | SNP | <i>qVGH19-1.2</i> |
| Chr19 | 46009487 | G | A | non_synonymous     | Glyma.19G203600 | SNP | <i>qVGH19-1.2</i> |
| Chr19 | 46016046 | C | T | non_synonymous     | Glyma.19G203800 | SNP | <i>qVGH19-1.2</i> |



Stable 4 The FPKM of different tissue sample for candidate genes in major QTL region

[illegible]

|                 |       |       |        |       |       |       |       |       |       |
|-----------------|-------|-------|--------|-------|-------|-------|-------|-------|-------|
| Glyma.13G007700 | 0.00  | 0.00  | 0.00   | 0.00  | 0.00  | 0.00  | 0.00  | 0.00  | 0.00  |
| Glyma.13G007800 | 1.79  | 1.27  | 1.54   | 0.67  | 0.92  | 2.28  | 2.60  | 1.38  | 0.94  |
| Glyma.13G007900 | 0.09  | 0.08  | 0.02   | 0.03  | 0.02  | 0.02  | 0.07  | 0.04  | 0.04  |
| Glyma.13G008000 | 7.35  | 5.35  | 3.16   | 3.92  | 6.77  | 8.33  | 15.56 | 12.25 | 3.04  |
| Glyma.13G008100 | 0.00  | 0.00  | 0.00   | 0.00  | 0.00  | 0.00  | 0.00  | 0.13  | 0.00  |
| Glyma.13G008200 | 11.60 | 14.61 | 12.32  | 11.54 | 13.12 | 8.46  | 12.42 | 10.66 | 10.73 |
| Glyma.13G008300 | 3.92  | 3.46  | 5.06   | 3.04  | 4.01  | 3.62  | 3.74  | 3.90  | 2.49  |
| Glyma.13G008400 | 0.00  | 0.00  | 0.00   | 0.00  | 0.00  | 0.00  | 0.00  | 0.00  | 0.00  |
| Glyma.13G008500 | 1.91  | 3.54  | 0.24   | 1.10  | 2.84  | 2.71  | 3.86  | 1.35  | 0.85  |
| Glyma.13G008600 | 0.17  | 0.11  | 0.00   | 0.06  | 0.00  | 0.36  | 0.19  | 0.03  | 0.14  |
| Glyma.13G008700 | 0.05  | 0.18  | 0.29   | 0.05  | 0.05  | 0.00  | 1.02  | 0.15  | 0.17  |
| Glyma.13G008800 | 0.00  | 0.00  | 0.00   | 0.00  | 0.00  | 0.00  | 0.03  | 0.00  | 0.04  |
| Glyma.13G008900 | 0.95  | 0.16  | 0.40   | 0.31  | 0.00  | 0.04  | 4.01  | 1.09  | 1.16  |
| Glyma.13G009000 | 0.03  | 0.43  | 0.00   | 0.96  | 0.13  | 0.10  | 0.00  | 0.04  | 0.09  |
| Glyma.13G009100 | 14.48 | 12.29 | 18.16  | 12.68 | 5.27  | 36.39 | 19.68 | 14.06 | 38.02 |
| Glyma.13G009200 | 0.00  | 0.00  | 0.00   | 0.00  | 0.00  | 0.00  | 0.00  | 0.00  | 0.00  |
| Glyma.13G009300 | 0.53  | 0.82  | 12.68  | 3.39  | 1.24  | 2.20  | 2.42  | 1.82  | 6.58  |
| Glyma.13G009400 | 0.00  | 0.00  | 0.00   | 0.00  | 0.00  | 0.00  | 0.00  | 0.00  | 0.00  |
| Glyma.13G009500 | 0.80  | 0.72  | 0.72   | 1.23  | 2.44  | 0.66  | 0.86  | 0.70  | 0.97  |
| Glyma.13G009600 | 0.08  | 0.13  | 0.18   | 0.09  | 0.23  | 0.13  | 0.15  | 0.22  | 0.37  |
| Glyma.13G009700 | 0.44  | 0.88  | 0.05   | 0.55  | 0.83  | 0.41  | 3.32  | 0.50  | 0.27  |
| Glyma.13G009800 | 13.13 | 14.21 | 18.50  | 11.79 | 10.78 | 15.13 | 20.46 | 15.93 | 18.79 |
| Glyma.13G009900 | 0.62  | 1.68  | 0.02   | 0.60  | 0.87  | 0.38  | 3.05  | 1.34  | 0.36  |
| Glyma.13G010000 | 0.56  | 0.02  | 0.09   | 0.00  | 0.00  | 0.06  | 0.28  | 0.09  | 0.05  |
| Glyma.13G010100 | 17.23 | 9.38  | 7.12   | 13.33 | 12.93 | 36.95 | 9.80  | 10.18 | 8.97  |
| Glyma.13G010200 | 7.18  | 5.90  | 25.84  | 6.79  | 6.85  | 3.73  | 11.73 | 5.78  | 10.70 |
| Glyma.13G010300 | 0.00  | 0.00  | 0.00   | 0.00  | 0.00  | 0.00  | 0.00  | 0.00  | 0.00  |
| Glyma.13G010400 | 1.09  | 0.00  | 0.00   | 0.00  | 0.00  | 0.00  | 0.00  | 0.00  | 0.00  |
| Glyma.13G010500 | 7.89  | 4.00  | 24.60  | 3.01  | 2.23  | 12.47 | 11.48 | 6.69  | 6.04  |
| Glyma.13G010600 | 0.00  | 0.00  | 0.00   | 0.00  | 0.00  | 0.00  | 0.00  | 0.00  | 0.00  |
| Glyma.13G010700 | 0.97  | 2.02  | 0.43   | 0.89  | 1.93  | 1.50  | 2.92  | 0.85  | 0.88  |
| Glyma.13G010800 | 0.00  | 0.00  | 0.00   | 0.03  | 0.00  | 0.00  | 0.00  | 0.01  | 0.00  |
| Glyma.13G010900 | 0.15  | 0.05  | 0.11   | 0.10  | 0.06  | 0.25  | 0.64  | 0.08  | 0.38  |
| Glyma.13G029500 | 0.30  | 9.56  | 21.13  | 1.11  | 38.84 | 0.07  | 3.40  | 9.08  | 2.18  |
| Glyma.13G029600 | 1.13  | 0.38  | 3.02   | 0.87  | 0.64  | 1.36  | 0.74  | 1.81  | 0.67  |
| Glyma.13G029700 | 3.75  | 2.74  | 3.49   | 2.02  | 2.51  | 2.45  | 2.51  | 3.13  | 3.01  |
| Glyma.13G029800 | 0.00  | 0.00  | 0.00   | 0.00  | 0.00  | 0.01  | 0.00  | 0.00  | 0.00  |
| Glyma.13G302800 | 1.47  | 6.48  | 12.77  | 13.75 | 7.68  | 0.69  | 2.40  | 6.12  | 14.05 |
| Glyma.13G302900 | 72.37 | 8.86  | 269.47 | 9.06  | 6.44  | 37.23 | 94.77 | 65.10 | 31.79 |
| Glyma.13G303000 | 4.30  | 2.96  | 0.21   | 1.80  | 1.70  | 3.81  | 11.83 | 2.36  | 1.25  |
| Glyma.13G303100 | 0.00  | 0.00  | 0.00   | 0.00  | 0.00  | 0.00  | 0.00  | 0.00  | 0.00  |
| Glyma.13G303200 | 0.00  | 0.03  | 0.00   | 0.00  | 0.00  | 0.00  | 0.00  | 0.00  | 0.13  |
| Glyma.13G303300 | 0.10  | 0.00  | 0.55   | 0.00  | 0.00  | 0.00  | 0.00  | 0.02  | 0.16  |
| Glyma.13G303400 | 0.08  | 0.42  | 1.35   | 3.12  | 0.66  | 0.16  | 0.79  | 0.24  | 1.30  |

|                 |       |       |       |       |       |       |       |       |       |
|-----------------|-------|-------|-------|-------|-------|-------|-------|-------|-------|
| Glyma.13G303500 | 1.36  | 1.61  | 7.44  | 0.89  | 1.01  | 1.09  | 3.06  | 1.39  | 3.20  |
| Glyma.13G303600 | 16.92 | 26.11 | 6.14  | 42.37 | 32.10 | 14.31 | 15.16 | 18.01 | 47.40 |
| Glyma.13G303700 | 5.19  | 11.25 | 20.42 | 30.11 | 10.64 | 1.17  | 4.53  | 5.35  | 13.35 |
| Glyma.13G303700 | 5.19  | 11.25 | 20.42 | 30.11 | 10.64 | 1.17  | 4.53  | 5.35  | 13.35 |
| Glyma.13G303800 | 1.04  | 0.18  | 11.99 | 0.06  | 0.47  | 0.00  | 0.58  | 2.25  | 3.35  |
| Glyma.13G303900 | 0.00  | 1.53  | 0.19  | 3.85  | 2.63  | 0.00  | 0.00  | 0.03  | 0.07  |
| Glyma.13G304000 | 0.01  | 0.62  | 0.16  | 4.50  | 0.28  | 0.02  | 0.11  | 0.53  | 1.45  |
| Glyma.13G304100 | 1.41  | 1.19  | 0.50  | 0.10  | 3.57  | 11.57 | 0.20  | 0.96  | 0.43  |
| Glyma.13G304200 | 0.89  | 0.03  | 1.22  | 0.45  | 0.03  | 0.61  | 3.24  | 1.54  | 1.08  |
| Glyma.13G304300 | 14.14 | 15.86 | 7.04  | 24.18 | 18.94 | 25.26 | 25.44 | 11.82 | 11.72 |
| Glyma.13G304400 | 15.98 | 57.59 | 1.31  | 57.74 | 29.33 | 11.02 | 54.73 | 33.13 | 8.66  |
| Glyma.13G304500 | 0.45  | 0.04  | 5.06  | 1.12  | 0.00  | 0.00  | 13.05 | 0.32  | 0.60  |
| Glyma.13G304600 | 0.00  | 0.00  | 0.00  | 0.00  | 0.41  | 0.00  | 0.00  | 0.00  | 0.00  |
| Glyma.13G304700 | 0.12  | 0.09  | 0.00  | 0.14  | 0.60  | 0.16  | 0.04  | 0.11  | 0.00  |
| Glyma.13G304800 | 0.06  | 0.16  | 0.00  | 0.37  | 0.35  | 0.48  | 0.00  | 0.04  | 0.00  |
| Glyma.13G304900 | 0.99  | 0.21  | 0.03  | 0.27  | 0.10  | 9.19  | 6.33  | 0.09  | 0.00  |
| Glyma.13G305000 | 7.54  | 5.12  | 8.74  | 3.72  | 6.45  | 8.83  | 7.15  | 6.40  | 11.65 |
| Glyma.19G192600 | 30.50 | 11.22 | 33.11 | 25.86 | 18.36 | 7.99  | 20.93 | 31.23 | 33.04 |
| Glyma.19G192700 | 0.72  | 0.55  | 0.00  | 0.81  | 0.48  | 1.00  | 5.74  | 0.39  | 3.39  |
| Glyma.19G192800 | 23.80 | 11.94 | 36.82 | 2.21  | 4.20  | 26.94 | 14.72 | 73.98 | 6.87  |
| Glyma.19G192900 | 0.02  | 7.24  | 0.00  | 11.49 | 17.98 | 0.16  | 0.04  | 0.44  | 0.04  |
| Glyma.19G193000 | 0.00  | 0.00  | 0.00  | 0.00  | 0.00  | 0.00  | 0.00  | 0.00  | 0.31  |
| Glyma.19G193100 | 3.06  | 2.42  | 0.70  | 1.77  | 3.18  | 3.49  | 4.32  | 2.58  | 1.99  |
| Glyma.19G193200 | 29.84 | 85.21 | 35.49 | 85.76 | 65.13 | 81.52 | 78.93 | 53.42 | 23.32 |
| Glyma.19G193300 | 3.97  | 0.54  | 9.23  | 0.97  | 0.49  | 0.47  | 2.82  | 15.30 | 2.06  |
| Glyma.19G193400 | 0.88  | 1.56  | 0.71  | 1.23  | 0.31  | 2.84  | 1.37  | 0.41  | 0.29  |
| Glyma.19G193500 | 8.07  | 8.97  | 1.12  | 2.45  | 6.78  | 14.52 | 11.12 | 16.65 | 1.83  |
| Glyma.19G193600 | 3.36  | 0.82  | 0.31  | 3.60  | 3.22  | 0.06  | 1.88  | 7.34  | 0.35  |
| Glyma.19G193700 | 5.92  | 38.91 | 7.01  | 81.06 | 48.78 | 2.23  | 6.37  | 3.91  | 11.97 |
| Glyma.19G193800 | 36.90 | 38.80 | 81.57 | 65.68 | 42.76 | 30.95 | 26.18 | 46.03 | 88.66 |
| Glyma.19G193900 | 3.27  | 0.80  | 0.78  | 0.52  | 1.05  | 2.80  | 0.22  | 1.81  | 37.31 |
| Glyma.19G194000 | 1.76  | 2.29  | 0.20  | 0.55  | 0.90  | 17.35 | 0.83  | 1.04  | 11.66 |
| Glyma.19G194100 | 1.27  | 0.69  | 0.00  | 0.52  | 0.70  | 1.74  | 1.61  | 0.71  | 0.17  |
| Glyma.19G194200 | 6.93  | 9.91  | 7.24  | 5.70  | 5.11  | 7.22  | 4.46  | 8.32  | 7.43  |
| Glyma.19G194300 | 0.00  | 2.76  | 0.00  | 0.45  | 1.34  | 0.04  | 1.82  | 0.10  | 0.00  |
| Glyma.19G194400 | 0.52  | 0.13  | 1.03  | 0.06  | 0.03  | 1.07  | 0.18  | 0.18  | 0.04  |
| Glyma.19G194500 | 0.23  | 0.91  | 0.03  | 0.37  | 0.31  | 4.95  | 0.42  | 1.35  | 0.27  |
| Glyma.19G194600 | 2.09  | 2.84  | 2.19  | 3.62  | 2.67  | 2.72  | 2.63  | 2.56  | 2.82  |
| Glyma.19G202300 | 0.02  | 0.32  | 4.84  | 0.43  | 0.15  | 0.00  | 0.07  | 0.00  | 0.05  |
| Glyma.19G202400 | 4.95  | 7.63  | 2.12  | 5.16  | 8.31  | 5.24  | 11.86 | 5.12  | 2.86  |
| Glyma.19G202500 | 0.33  | 0.24  | 0.48  | 0.16  | 0.53  | 0.23  | 0.26  | 0.33  | 0.16  |
| Glyma.19G202600 | 5.12  | 5.43  | 3.17  | 4.27  | 5.68  | 6.94  | 4.76  | 4.35  | 1.35  |
| Glyma.19G202700 | 0.00  | 0.00  | 0.00  | 0.53  | 0.07  | 0.00  | 0.00  | 0.00  | 0.13  |
| Glyma.19G202800 | 0.42  | 0.25  | 0.14  | 0.44  | 0.35  | 0.46  | 0.58  | 0.88  | 5.88  |

|                 |        |        |        |        |        |        |        |        |        |
|-----------------|--------|--------|--------|--------|--------|--------|--------|--------|--------|
| Glyma.19G202900 | 0.07   | 4.17   | 29.58  | 4.57   | 5.26   | 0.04   | 0.10   | 0.56   | 2.93   |
| Glyma.19G203000 | 1.95   | 1.64   | 0.24   | 1.70   | 1.66   | 3.13   | 0.97   | 0.79   | 1.03   |
| Glyma.19G203100 | 4.05   | 2.19   | 3.22   | 3.67   | 3.22   | 7.01   | 3.65   | 3.50   | 2.14   |
| Glyma.19G203200 | 10.53  | 6.93   | 5.94   | 8.92   | 6.11   | 10.51  | 5.81   | 10.72  | 10.45  |
| Glyma.19G203300 | 110.61 | 287.37 | 159.57 | 233.05 | 212.45 | 319.46 | 205.83 | 248.26 | 141.14 |
| Glyma.19G203400 | 0.14   | 0.64   | 0.27   | 0.10   | 0.86   | 0.20   | 0.63   | 2.97   | 0.08   |
| Glyma.19G203500 | 1.42   | 4.23   | 0.02   | 2.76   | 3.61   | 1.52   | 6.02   | 1.91   | 0.74   |
| Glyma.19G203600 | 0.21   | 0.23   | 0.23   | 0.38   | 0.20   | 0.27   | 0.28   | 0.58   | 0.29   |
| Glyma.19G203700 | 0.01   | 0.15   | 0.23   | 3.16   | 0.30   | 0.00   | 0.01   | 0.01   | 0.00   |
| Glyma.19G203800 | 0.00   | 0.09   | 0.17   | 0.03   | 0.14   | 0.00   | 0.00   | 0.00   | 0.00   |
| Glyma.19G203900 | 1.14   | 0.55   | 7.28   | 2.26   | 1.12   | 0.00   | 2.54   | 1.34   | 2.49   |
| Glyma.19G204000 | 10.63  | 9.04   | 8.40   | 9.19   | 9.21   | 13.38  | 7.32   | 10.94  | 10.53  |
| Glyma.19G204100 | 6.13   | 3.45   | 2.74   | 6.01   | 4.71   | 4.39   | 3.62   | 5.84   | 3.59   |
| Glyma.19G204200 | 3.94   | 3.83   | 3.04   | 3.53   | 4.35   | 4.66   | 3.18   | 3.04   | 3.85   |
| Glyma.19G204300 | 0.00   | 0.00   | 0.00   | 0.00   | 0.00   | 0.00   | 0.00   | 0.00   | 0.00   |
| Glyma.19G204400 | 29.01  | 31.30  | 23.45  | 24.07  | 22.22  | 36.88  | 27.06  | 33.53  | 15.92  |
| Glyma.19G204500 | 11.92  | 13.90  | 20.20  | 13.54  | 14.58  | 8.75   | 10.44  | 14.85  | 23.67  |
| Glyma.19G204600 | 2.30   | 1.77   | 0.18   | 0.57   | 0.71   | 5.58   | 8.23   | 1.46   | 1.07   |
| Glyma.19G204700 | 3.79   | 2.47   | 3.36   | 1.62   | 1.96   | 2.53   | 2.17   | 2.58   | 1.74   |
| Glyma.19G204800 | 15.54  | 22.02  | 17.93  | 14.67  | 18.58  | 22.90  | 16.34  | 17.44  | 14.91  |
| Glyma.19G204900 | 0.12   | 0.43   | 0.00   | 0.22   | 0.56   | 0.05   | 0.34   | 1.21   | 0.04   |
| Glyma.19G205000 | 119.47 | 284.96 | 104.14 | 178.26 | 201.57 | 650.50 | 159.51 | 129.81 | 55.13  |
